# Supplementary material for: Preparation of various kinds of copper sulfides in a facile way and the enhanced catalytic activity by visible light
Source: Royal Society of Chemistry journal article supplement (doi:10.1039/c3ta11739a), 2013-01-01
Supplement: c3ta11739a.pdf [file c3ta11739a.pdf]

## Electronic Supplementary information

### Supplement data

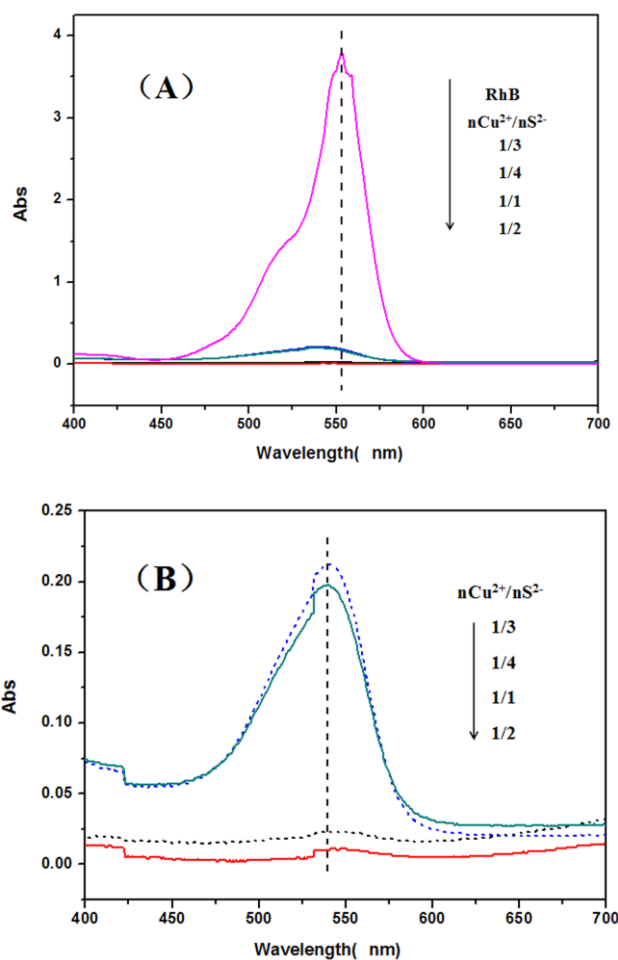

**Figure S-A** (A) UV-Vis absorption spectra of degraded RhB solution after catalytic reaction by as-prepared copper sulfide with different Cu/S ratios: from up to down, original RhB solution,  $\text{Cu}^{2+}/\text{S}^{2-}=1/1$ ;  $\text{Cu}^{2+}/\text{S}^{2-}=1/2$ ;  $\text{Cu}^{2+}/\text{S}^{2-}=1/3$ ;  $\text{Cu}^{2+}/\text{S}^{2-}=1/4$ . (B) The magnified picture of (A) except the plot of original RhB solution.
